# Supplementary material for: Achiral flexible liquid crystal trimers exhibiting gyroid-like surfaces in chiral conglomerate phases
Source: Royal Society of Chemistry journal article supplement (doi:10.1039/c7sm01499f), 2017-01-01
Supplement: c7sm01499f1.pdf [file c7sm01499f1.pdf]

## Electronic Supporting Information

### Achiral flexible liquid crystal trimers exhibiting gyroid-like surfaces in chiral conglomerate phases

Haruna Sasaki,<sup>a</sup> Yoichi Takanishi,<sup>b</sup> Jun Yamamoto,<sup>b</sup> and Atsushi Yoshizawa\*,<sup>a</sup>

<sup>a</sup> Department of Frontier Materials Chemistry, Graduate School of Science and Technology, Hirosaki University, 3 Bunkyo-cho, Hirosaki, 036-8561, Japan

E-mail: [ayoshiza@hirosaki-u.ac.jp](mailto:ayoshiza@hirosaki-u.ac.jp)

<sup>b</sup> Department of Physics, Graduate School of Science, Kyoto University, Oiwake-cho, Kitashirakawa, Sakyo-ku, Kyoto, 606-8502, Japan

#### Contents

1. Characterization of trimer **I-(9,11)**.
2. Fig. S-1 Polarized optical texture of trimer **I-(9,9)** on a glass slide with a cover glass in the DC phase at 120 °C under crossed and uncrossed polarizers.
3. Fig. S-2 AFM images of the surface structures of **I-(9,9)** without a top cover on (a) silicon wafer, (b) glass coated with a homeotropically aligning agent, or (c) glass coated with a unidirectionally buffed polyimide aligning agent at room temperature.
4. Fig. S-3 AFM image of the surface structure of **I-(9,9)** in the DC phase formed by cooling a sample with a cover glass at room temperature.
5. Fig. S-4 Phase transition temperatures on cooling of trimers **I-(7,7)**, **I-(7,9)**, **I-(9,9)**, and **I-(9,11)**.
7. Fig. S-5 Polarized optical textures of trimer **I-(9,11)** in the DC phase at 124 °C and those in the DC' phase at 90 °C.

8. Fig. S-6 SEM image of the surface pattern of trimer **I-(9,9)** in the thinnest part of the LC droplet. The sample on an untreated glass substrate without a top cover was cooled to the DC phase. It was coated with platinum before being analyzed on a JEOL JSM-7000 FE-SEM using accelerating voltages of 10 keV.

9. Fig. S-7 (a) Polarized optical texture of **I-(7,7)** on a glass plate without a cover glass in the N phase. (b) Polarized optical texture in the N phase just above the DC phase. The circle indicates the appearance of the transient state.

Characterization of trimer **I**–(9,11).

**2-{4-[9-(4-(4-Octyloxyphenyl)phenoxy)undecyloxy]phenyl}-5-{7-[4-(5-octyloxyimidin-2-yl)phenoxy]nonyloxy}pyrimidine (I–(9,11))**.

$^1\text{H}$  NMR (500 MHz,  $\text{CDCl}_3$ , TMS):  $\delta$ =8.40 (s, 4H, Ar-H), 8.25 (d, 4H, Ar-H,  $J$  = 9.2 Hz), 7.45 (d, 4H, Ar-H,  $J$  = 8.6 Hz), 6.96 (d, 4H, Ar-H,  $J$  = 8.6 Hz), 6.93 (d, 4H, Ar-H,  $J$  = 8.6 Hz), 4.07 (t, 4H,  $-\text{OCH}_2-$ ,  $J$  = 6.6 Hz), 4.02 (t, 2H,  $-\text{OCH}_2-$ ,  $J$  = 6.6 Hz), 4.01 (t, 2H,  $-\text{OCH}_2-$ ,  $J$  = 6.6 Hz), 3.97 (t, 4H,  $-\text{OCH}_2-$ ,  $J$  = 6.6 Hz), 1.82 (quin, 6H, aliphatic-H,  $J$  = 6.9 Hz), 1.79 (quin, 6H, aliphatic-H,  $J$  = 7.0 Hz), 1.47–1.29 (m, 44H, aliphatic-H), 0.89 (t, 6H,  $-\text{CH}_3$ ,  $J$  = 7.2 Hz) ; IR(KBr):  $\nu$ = 2923, 2851  $\text{cm}^{-1}$  (C-H), 1608 (Ar-H), 1274 (C-O). Elemental analysis (%): C, 76.8; H, 8.91; N, 5.27 calc. for  $\text{C}_{72}\text{H}_{102}\text{O}_6\text{N}_4$ . Found C, 76.9; H, 8.98; N, 5.15.

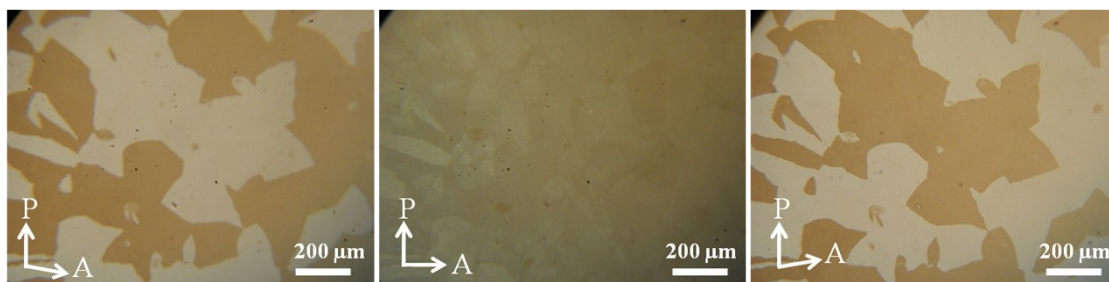

Fig. S-1 Polarized optical texture of trimer I-(9,9) on a glass slide with a cover glass in the DC phase at 120 °C under crossed and uncrossed polarizers.

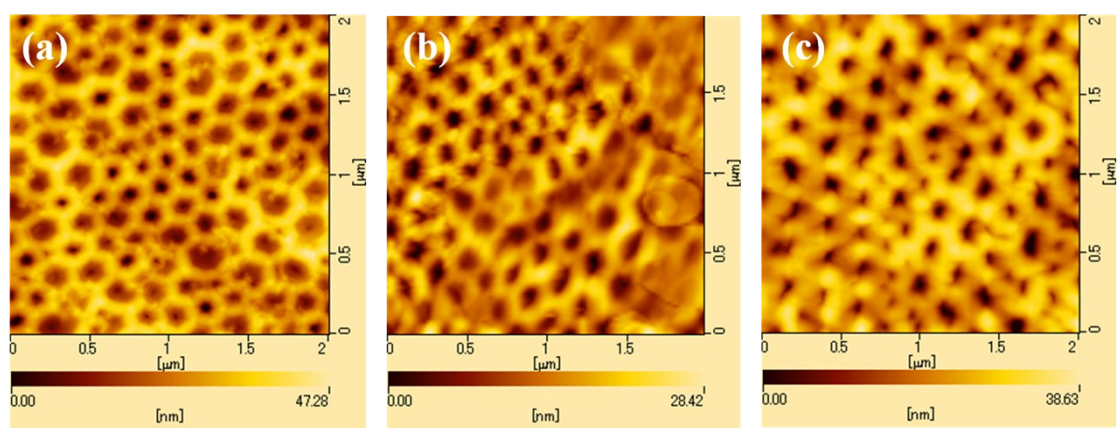

Fig. S-2 AFM images of the surface structures of **I-(9,9)** without a top cover on (a) silicon wafer, (b) glass coated with a homeotropically aligning agent, or (c) glass coated with a unidirectionally buffed polyimide aligning agent at room temperature.

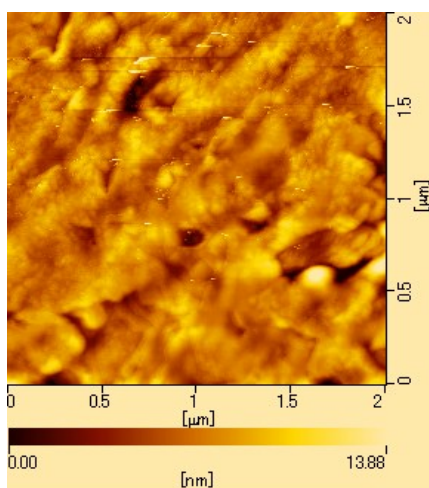

Fig. S-3 AFM image of the surface structure of **I-(9,9)** in the DC phase formed by cooling a sample with a cover glass at room temperature.

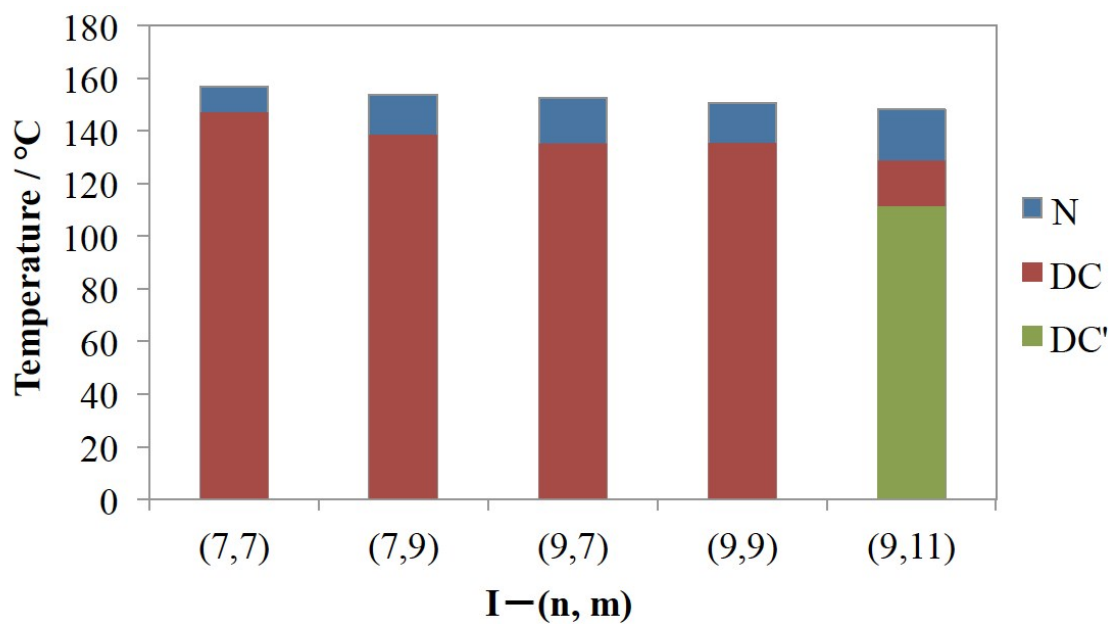

Fig. S-4 Phase transition temperatures on cooling of trimers I-(7,7), I-(7,9), I-(9,9), and I-(9,11).

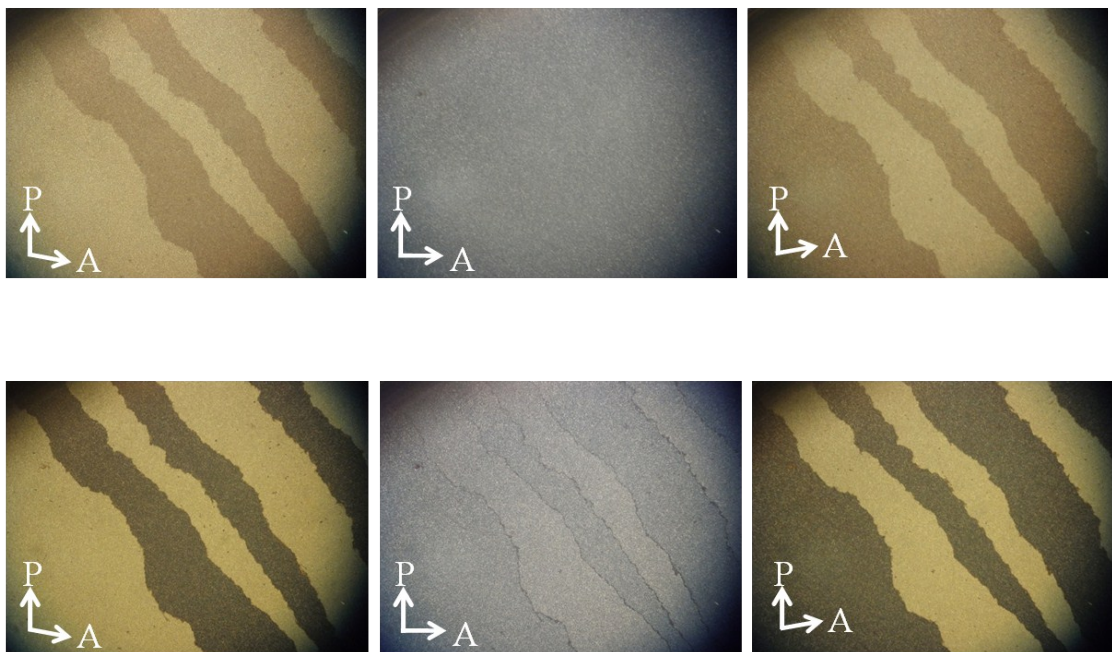

Fig. S-5 Polarized optical textures of trimer **I-(9,11)** in the DC phase at 124 °C and those in the DC' phase at 90 °C.



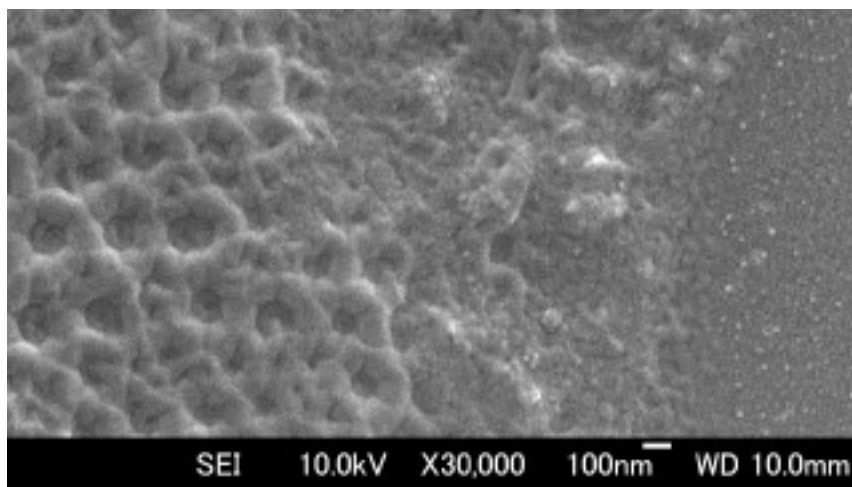

Fig. S-6 SEM image of the surface pattern of trimer **I-(9,9)** in the thinner part of the LC droplet. The sample on an untreated glass substrate without a top cover was cooled to the DC phase. It was coated with platinum before being analyzed on a JEOL JSM-7000 FE-SEM using accelerating voltages of 10 keV.

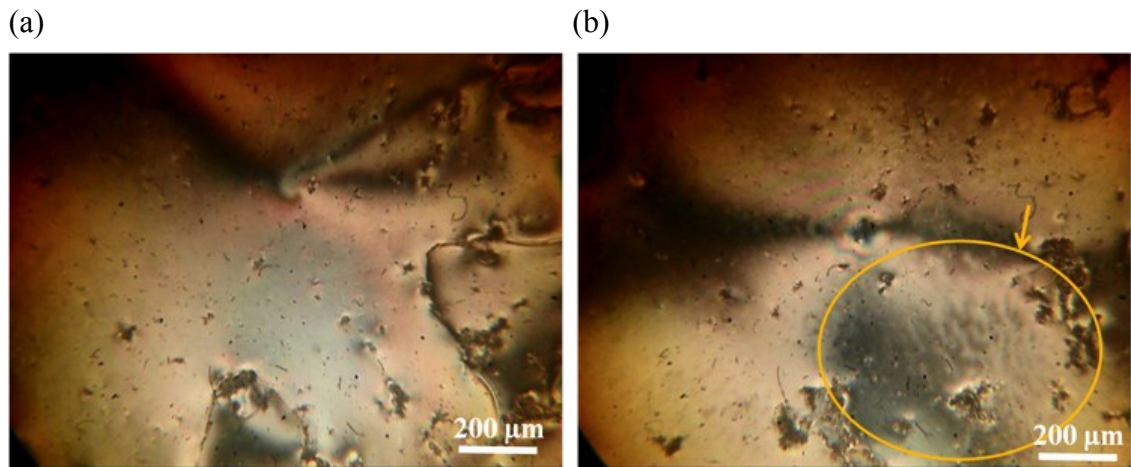

Fig. S-7 (a) Polarized optical texture of I-(7,7) on a glass plate without a cover glass in the N phase. (b) Polarized optical texture in the N phase just above the DC phase. The circle indicates the appearance of the transient state.
